# Supplementary material for: Unloading‐Induced Skeletal Interoception Alters Hypothalamic Signaling to Promote Bone Loss and Fat Metabolism
Source: PubMed Central journal article supplement (PMC10724445; doi:10.1002/advs.202305042), 2023-10-25
Supplement: ADVS-10-2305042-s001.pdf [file ADVS-10-2305042-s001.pdf]

## Supporting Information

for *Adv. Sci.*, DOI 10.1002/adv.202305042

Unloading-Induced Skeletal Interoception Alters Hypothalamic Signaling to Promote Bone Loss and Fat Metabolism

*Qiaoyue Guo, Ningrong Chen, Kalp Patel, Mei Wan, Junying Zheng and Xu Cao\**

## Supplementary data

### Fig. S1

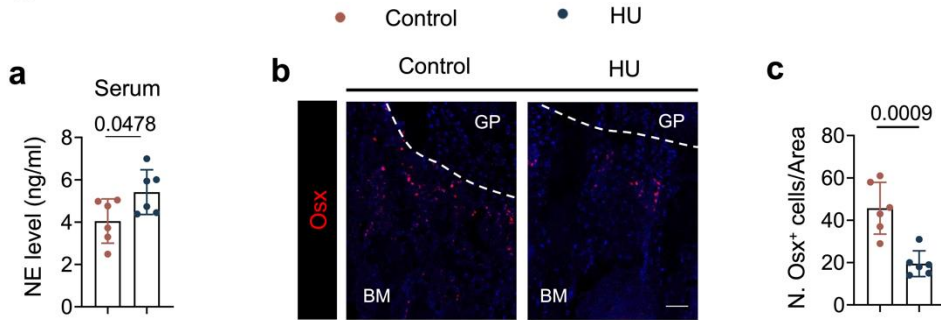

**Fig. S1: Sympathetic tone was increased with inhibition of Osx positive osteoblasts in bone marrow during HU.**

(a) Enzyme-linked immunosorbent assay (ELISA) analysis of NE level in serum of control and HU mice. N=6. (b) Representative immunofluorescent staining of Osterix (Osx)-positive cells (red) and (c) their quantitative analysis in femoral bone marrow area of control and HU mice. Scale bar=40 $\mu$ m. N=6.

### Fig. S2

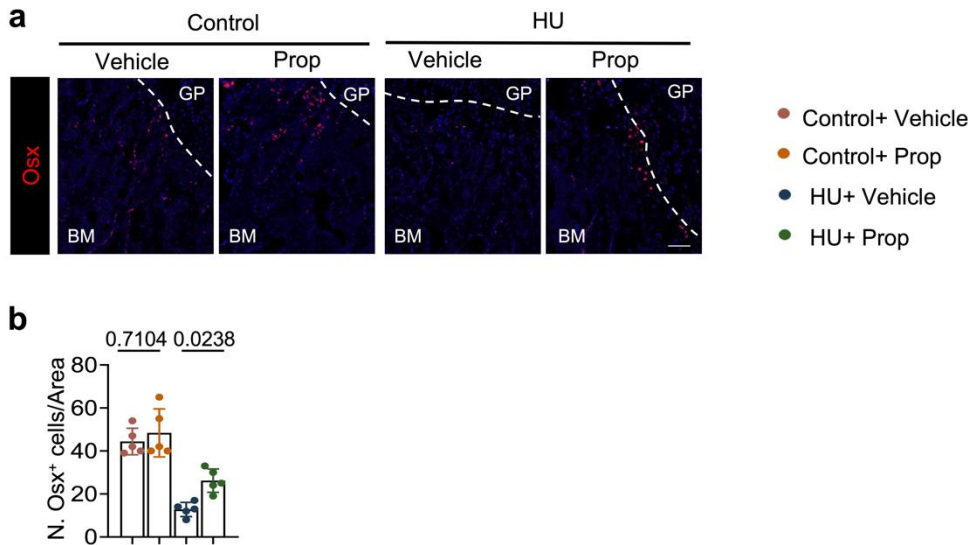

**Fig. S2: The number of Osx positive osteoblasts could be attenuated by propranolol (Prop) in HU mice.**

(a) Representative immunofluorescent staining of Osx<sup>+</sup> cells (red) and (b) their quantitative analysis in femoral bone marrow area of different treatment group. GP for growth plate and BM for bone marrow. Scale bar= 40 $\mu$ M. N=5.

**Fig. S3**

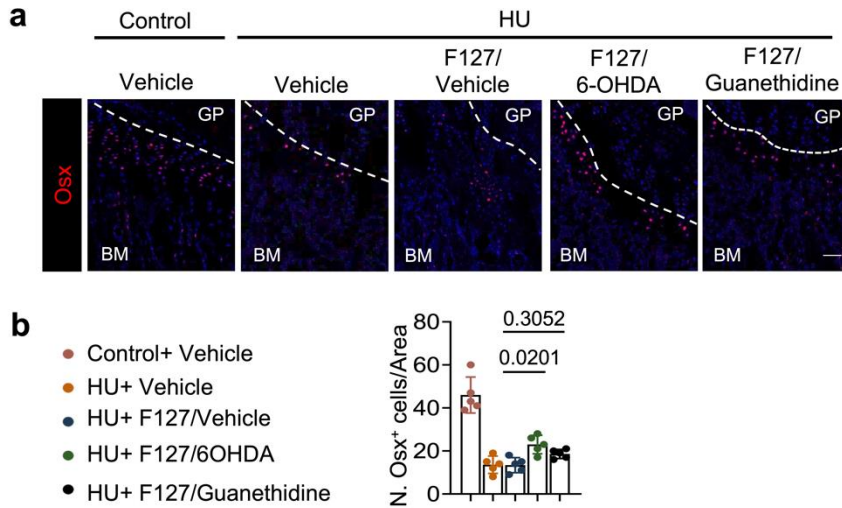

**Fig. S3: The number of Osx positive osteoblasts in bone marrow could be recovered by depletion of TH-positive sympathetic nerves in HU mice.**

(a) Representative immunofluorescent staining of Osx<sup>+</sup> cells (red) and (b) their quantitative analysis in femoral bone marrow area of each treatment groups. GP for growth plate and BM for bone marrow. Scale bar=40µm, N=5.

**Fig. S4**

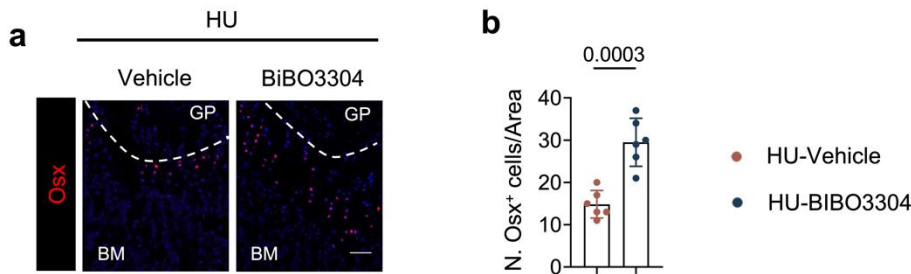

**Fig. S4: The number of Osx positive osteoblasts in bone marrow could be rescued by treatment of NPY Y1R inhibitor in HU mice.**

(a) Representative immunofluorescent staining of Osx<sup>+</sup> cells (red) and (b) their quantitative analysis in femoral bone marrow area of vehicle and BiBO3304 treated HU mice. Scale bar=40µm, N= 6.

**Fig. S5**

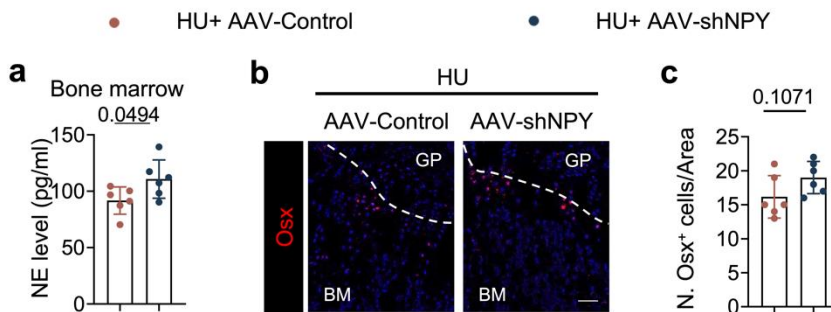

**Fig. S5 Knockdown of NPY mRNA expression in the ARC increased sympathetic activity with limited effects**

**on Osx positive osteoblasts in bone marrow of HU mice.**

(a) ELISA evaluation of NE level in serum of AAV-Control and AAV-shNPY treated HU mice. (b) Representative immunofluorescent staining of osterix (Osx)-positive cells (red) and (b) their quantitative analysis in femoral bone marrow area of AAV-Control and AAV-shNPY treated HU mice. Scale bar=40 $\mu$ m, N= 6.
